# Supplementary material for: Hydrodeoxygenation of biomass-derived furans into liquid alkanes over a Ru/WO3–ZrO2 catalyst
Source: Royal Society of Chemistry journal article supplement (doi:10.1039/d4se00717d), 2024-01-01
Supplement: d4se00717d1.pdf [file d4se00717d1.pdf]

## Electronic Supplementary Information (ESI)

### Hydrodeoxygenation of Biomass-derived Furans into Liquid Alkanes over Ru/WO<sub>3</sub>-ZrO<sub>2</sub> Catalyst

Bhanu Priya, Ankit Kumar, and Sanjay Kumar Singh\*

Catalysis Group, Department of Chemistry, Indian Institute of Technology Indore, Simrol, Indore - 453552, M.P., India

Email: [sksingh@iiti.ac.in](mailto:sksingh@iiti.ac.in) (SKS)

#### Materials and Instrumentation.

All the chemical reagents and metal salts were available commercially and were used as such without any further purification. RuCl<sub>3</sub>.xH<sub>2</sub>O, ammonium metatungstate, sodium borohydride, furfural, 5-methyl furfural, and acetone were purchased from Sigma Aldrich, India and TCI analytics, India. High-purity hydrogen gas was procured from Sigma Gases, India.

Powder X-ray Diffraction (P-XRD) measurements were performed using Rigaku Smart Lab, an Automated Multipurpose X-ray diffractometer at 40 kV and 30 mA (Cu<sub>α</sub> λ=1.5418 Å) over a 2θ range of 15° to 80°. Field emission scanning electron microscopic (FE-SEM) images were collected with a JOEL-7610 F Plus. X-ray photoelectron spectroscopy (XPS) was performed using Omnicron ESCA (Electron Spectroscopy for Chemical Analysis), Oxford Instrument, Germany. Aluminium (Al) anode was used as a monochromatic X-ray source (1486.7 eV) for XPS measurements. Transmission electron microscopic (TEM) imaging and energy dispersive X-ray spectroscopy (EDS) mapping were performed on the FEI Titan Themis with an operating voltage of 300 kV. For TEM analysis, the catalyst was suspended in ethanol, and a few drops of the suspension were deposited over the amorphous carbon-coated 400 mesh Cu grid and dried at room temperature. The NH<sub>3</sub> TPD measurements were performed using BELCAT II. Prior to the TPD analyses, the sample was outgassed under a He flow of 20 mL/min with a heating ramp of 10°C/min up to 150 °C. The NH<sub>3</sub> TPD experiments were started by cooling the temperature to 50 °C followed by treating it with an ammonia stream (10 vol%

in He) of 20 mL/min for 30 min. After this, the physically adsorbed NH<sub>3</sub> was removed by flowing He (20 mL/min) for 30 min. Finally, temperature-programmed desorption was performed by subjecting the sample to a heating rate of 10 °C/min up to 700 °C. N<sub>2</sub> adsorption-desorption was performed using a Quantachrome Autosorb iQ2 TPX automated gas sorption system at 77 K. The Brunauer-Emmett-Teller (BET) equation was used to calculate the specific surface areas of the adsorption data for the relative pressure (P/P<sub>0</sub>) range of 0.05-0.30. GC-MS analysis was performed using Shimadzu GC-MS, QP2010 Mass Spectrometer and RTX-5MS tubular 5% diphenyl/95% dimethyl polysiloxane capillary column, 30 m long, 0.25 mm inner diameter with a df value of 1.0 μm. The oven temperature was varied from 30 to 200 °C at a heating rate of 20 °C min<sup>-1</sup>, and the detector temperature was set at 350 °C.

**Table S1** Literature reported catalytic systems for HDO of biomass-derived furans to alkanes.

| Entry | Substrate                                                                           | Catalyst                                                    | Solvent     | Conditions                                                                   | Product (yield%) | Ref.      |
|-------|-------------------------------------------------------------------------------------|-------------------------------------------------------------|-------------|------------------------------------------------------------------------------|------------------|-----------|
| 1     | 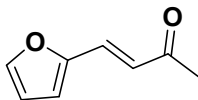 | Ru/5WO <sub>3</sub> -ZrO <sub>2</sub>                       | Cyclohexane | 150 °C, 2 MPa H <sub>2</sub> , 3 h                                           | Octane (78)      | This work |
| 2     |  | Ru/5WO <sub>3</sub> -ZrO <sub>2</sub>                       | Cyclohexane | 150 °C, 2 MPa H <sub>2</sub> , 6 h                                           | Nonane (96)      | This work |
| 3     |  | Pt/Co <sub>2</sub> AlO <sub>4</sub> , Pt/NbOPO <sub>4</sub> | Ethanol     | (i) 130-150 °C, 2.0 MPa H <sub>2</sub> ; (ii) 175 °C, 2.5 MPa H <sub>2</sub> | Octane (76)      | S1        |
| 4     |  | Pd/NbOPO <sub>4</sub>                                       | Cyclohexane | 170 °C, 2 MPa H <sub>2</sub> , 24 h                                          | Octane (94)      | S2        |
| 5     |  | Pd/Nb <sub>2</sub> O <sub>5</sub>                           | Cyclohexane | 170 °C, 2 MPa H <sub>2</sub> , 24 h                                          | Octane (96)      | S2        |
| 6     |  | Pd/10Nb <sub>2</sub> O <sub>5</sub> /SiO <sub>2</sub>       | Cyclohexane | 170 °C, 2.5 MPa H <sub>2</sub> , 24 h                                        | Octane (95.3)    | S3        |

|    |                                                                                     |                                                                  |             |                                                                                                  |                                 |     |
|----|-------------------------------------------------------------------------------------|------------------------------------------------------------------|-------------|--------------------------------------------------------------------------------------------------|---------------------------------|-----|
| 7  | 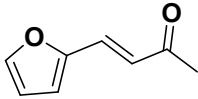   | NiCu/Nb <sub>2</sub> O <sub>5</sub>                              | Cyclohexane | 250 °C, 4 MPa H <sub>2</sub> , 12 h                                                              | Octane (86.5)                   | S4  |
| 8  |    | Pd/C HPW                                                         | Cyclohexane | 130 °C, 1 MPa H <sub>2</sub> , 4 h                                                               | Octane (96.6)                   | S5  |
| 9  |    | (i) Pd/C, glacial acetic acid;<br>(ii) Pd/C-La(OTf) <sub>3</sub> | Acetic acid | (i) 65 °C, 0.37 MPa H <sub>2</sub> , 2 h;<br>(ii) 100 °C, 2.07 MPa H <sub>2</sub> , 200 °C, 16 h | Nonane (87)                     | S6  |
| 10 |    | Pd/2.5FeO <sub>x</sub> /SiO <sub>2</sub>                         | Neat        | 200 °C, 0.1 MPa H <sub>2</sub> (flow rate: 110 mL min <sup>-1</sup> at STP), 5 h                 | C9-C14 alkanes (87-94)          | S7  |
| 11 |   | Ir-MoO <sub>x</sub> /SiO <sub>2</sub>                            | Cyclohexane | 180 °C, 5 MPa H <sub>2</sub> , 24 h                                                              | C15 alkane (85)                 | S8  |
| 12 |  | Ir-MoO <sub>x</sub> /SiO <sub>2</sub>                            | Cyclohexane | 180 °C, 5 MPa H <sub>2</sub> , 24 h                                                              | C15 alkane (43)                 | S8  |
| 13 |  | Ir-ReO <sub>x</sub> /SiO <sub>2</sub>                            | Cyclohexane | 180 °C, 5 MPa H <sub>2</sub> , 20 h                                                              | C15 alkane (60.6)               | S9  |
| 14 |  | Pd/C + H <sub>3</sub> PO <sub>4</sub>                            | Water       | 240 °C, 4 MPa H <sub>2</sub> , 12 h                                                              | C12, C14 and C18 alkanes (57.1) | S10 |
| 15 |  | Ru/HAP + HZSM-5                                                  | Cyclohexane | 180 °C, 4 MPa H <sub>2</sub> , 10 h                                                              | C8-C10 alkanes (91.9)           | S11 |

16

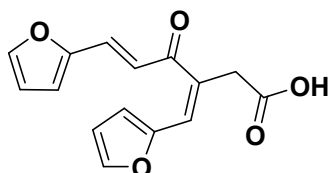Pd-Ru/HAP  
+ ZrPCyclo-  
hexane200 °C, 4 MPa  
H<sub>2</sub>, 10 hC8-C15  
alkanes  
(81.56)

S12

HPW – phospho tungstic acid, ZrP – zirconium phosphate, HAP - hydroxyapatite

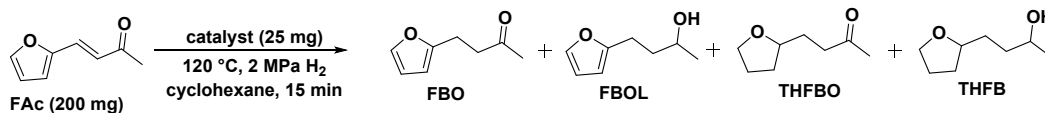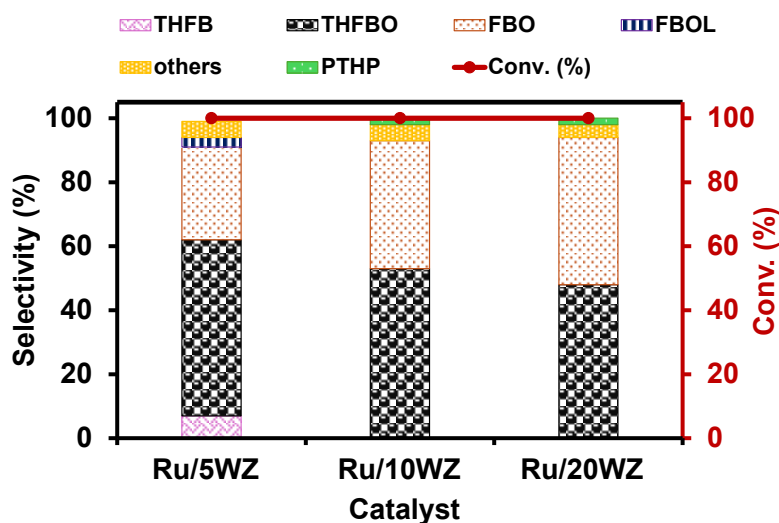

**Fig. S1** Control experiment to evaluate the effect of higher WO<sub>3</sub> loading on HDO of FAc over Ru/5WZ, Ru/10WZ and Ru/20WZ catalysts. Reaction conditions: FAc (200 mg), Ru/xWZ (25 mg), 120 °C, 2 MPa H<sub>2</sub>, cyclohexane (10 mL), 15 min.

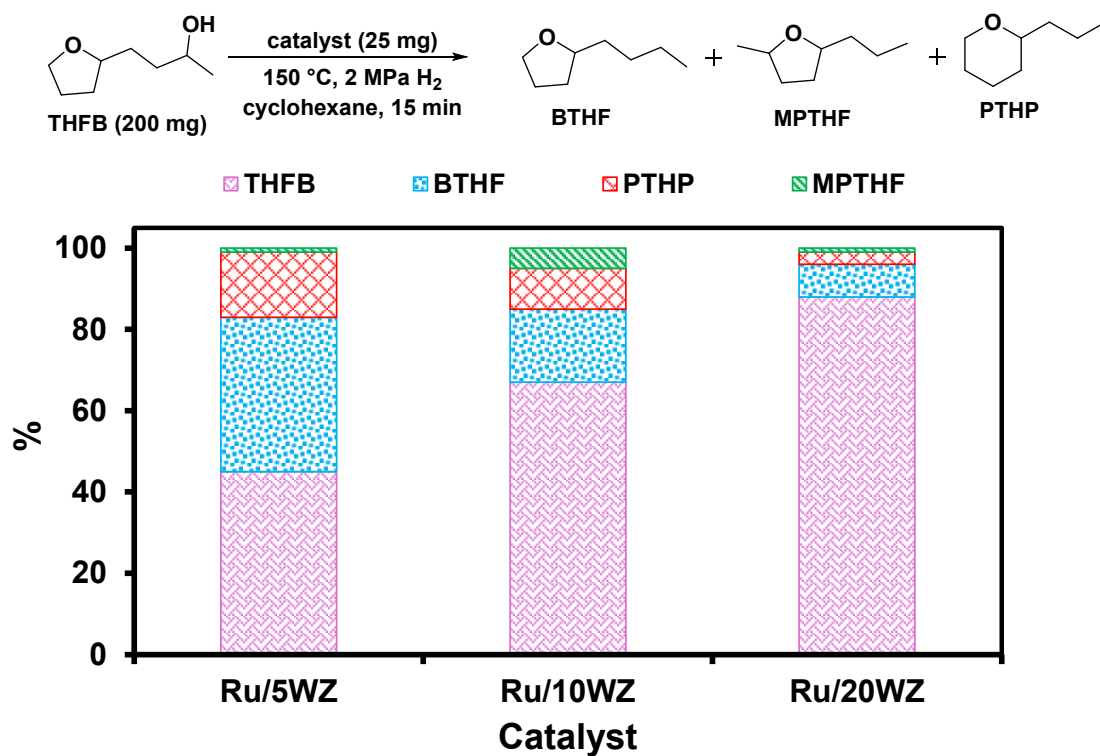

**Fig. S2** Control experiment to evaluate the effect of higher  $\text{WO}_3$  loading on HDO of THFB over various Ru/xWZ catalysts. Reaction conditions: THFB (200 mg), Ru/xWZ (25 mg), 150  $^\circ\text{C}$ , 2 MPa  $\text{H}_2$ , cyclohexane (10 mL), 15 min.

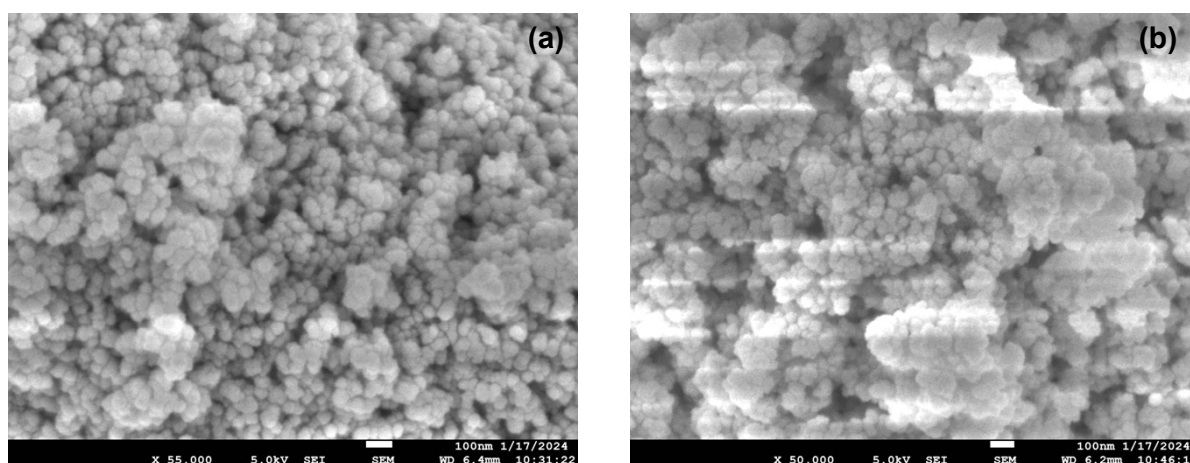

**Fig. S3** FESEM images of (a) 5WZ, and (b) Ru/5WZ catalyst.

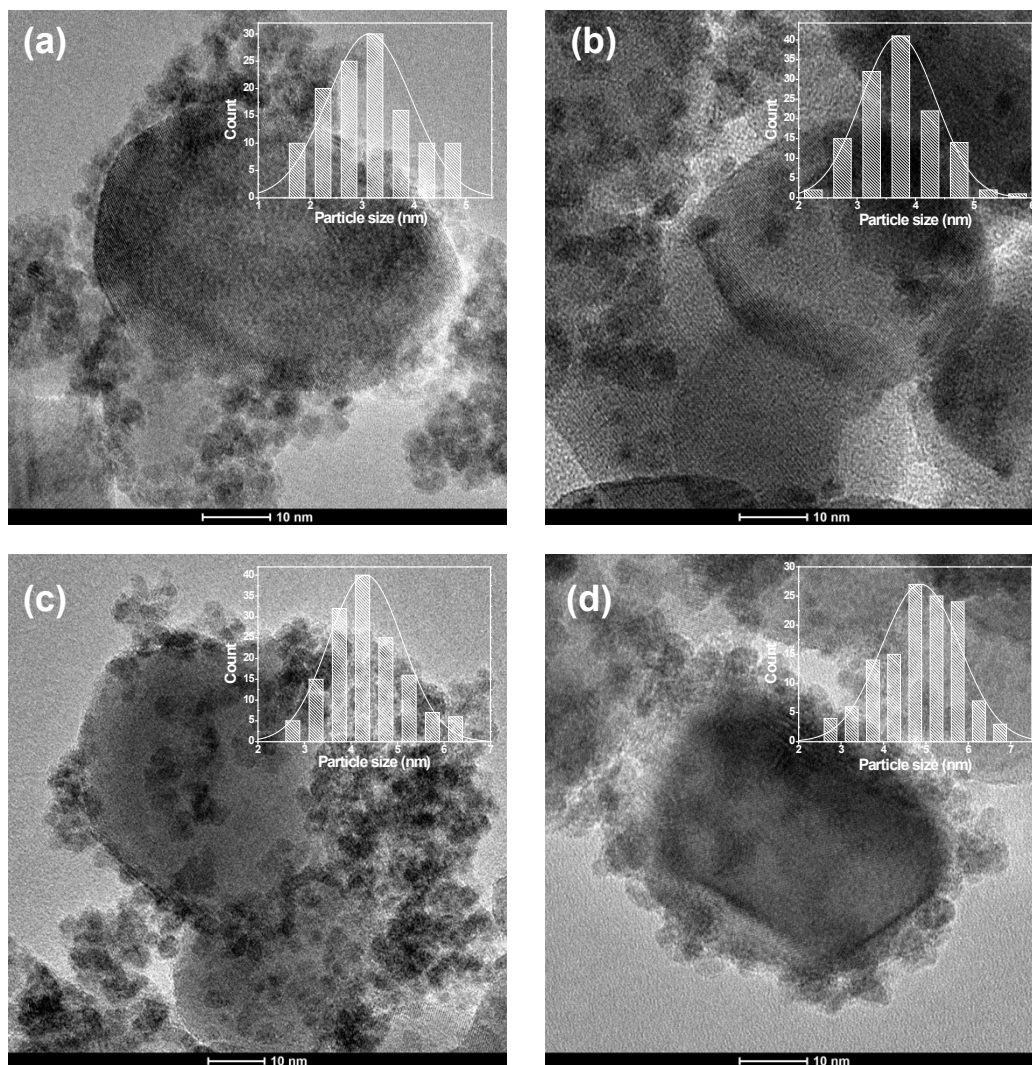

**Fig. S4** HR-TEM images for (a) Ru/2.5WZ, (b) Ru/5WZ, (c) Ru/10WZ, and (d) Ru/20WZ with particle size distribution curves (inset).

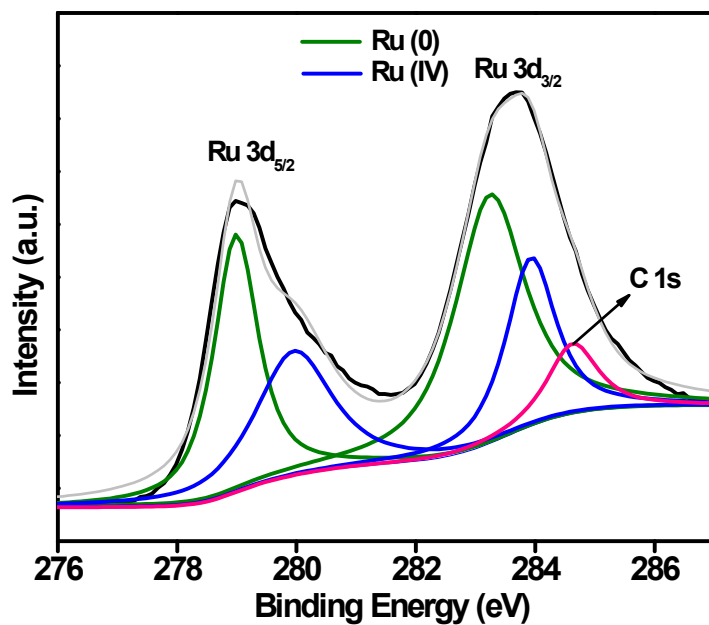

Fig. S5 XPS of Ru 3d core levels of Ru/5WZ catalyst.

Table S2 HDO of FAc over various catalysts.

| Catalyst | Product Selectivity (%) |      |       |          |         |
|----------|-------------------------|------|-------|----------|---------|
|          | BTHF                    | PTHP | MPTHF | Octanols | Alkanes |
| Ru/Z     | 15                      | 73   | 7     | -        | 5       |
| Ru/1WZ   |                         |      |       |          | 23      |
| Ru/2.5WZ | 12                      | 6    | 5     | -        | 77      |
| Ru/5WZ   | -                       | -    | -     | -        | 100     |
| Ru/7.5WZ | -                       | 7    | 6     | -        | 87      |
| Ru/10WZ  | 6                       | 12   | 3     | 4        | 75      |
| Ru/20WZ  | 43                      | 32   | 5     | -        | 20      |
| Ru/W     | 55                      | 36   | 7     | 2        | -       |

Reaction Conditions: FAc (200 mg), catalyst (50 mg), 150 °C, 2 MPa H<sub>2</sub>, cyclohexane (10 mL), 3 h. Conversion was >99% in all the cases.

**Table S3** Textural properties of different supported Ru catalysts.

| <b>Catalyst</b> | <b>S<sub>BET</sub><br/>(m<sup>2</sup>/g)<sup>a</sup></b> | <b>Pore size<br/>(nm)<sup>b</sup></b> | <b>Pore volume<br/>(g/cm<sup>3</sup>)<sup>b</sup></b> | <b>Acidic sites<br/>(mmol/g)<sup>c</sup></b> | <b>Average particle<br/>size (nm)<sup>d</sup></b> |
|-----------------|----------------------------------------------------------|---------------------------------------|-------------------------------------------------------|----------------------------------------------|---------------------------------------------------|
| Ru/Z            | 25.7                                                     | 3.08                                  | 0.015                                                 | 0.533                                        | n.d.                                              |
| Ru/1WZ          | 22.4                                                     | 3.07                                  | 0.013                                                 | n.d.                                         | n.d.                                              |
| Ru/2.5WZ        | 24.1                                                     | 3.07                                  | 0.015                                                 | n.d.                                         | 3.1                                               |
| Ru/5WZ          | 25.2                                                     | 3.07                                  | 0.015                                                 | 0.708                                        | 3.7                                               |
| Ru/7.5WZ        | 25.4                                                     | 3.43                                  | 0.014                                                 | n.d.                                         | n.d.                                              |
| Ru/10WZ         | 21.5                                                     | 3.07                                  | 0.013                                                 | 0.790                                        | 4.3                                               |
| Ru/20WZ         | 18.4                                                     | 3.43                                  | 0.012                                                 | 0.910                                        | 4.8                                               |
| Ru/W            | 11.5                                                     | 3.08                                  | 0.006                                                 | n.d.                                         | n.d.                                              |

<sup>a</sup>Surface area was calculated using N<sub>2</sub> adsorption-desorption at 77 K.

<sup>b</sup>Pore size and pore volume were calculated using the BJH method.

<sup>c</sup>Acidic sites were measured by NH<sub>3</sub>-TPD analysis.

<sup>d</sup>Particle size was calculated from HR-TEM images.

n.d. – not determined



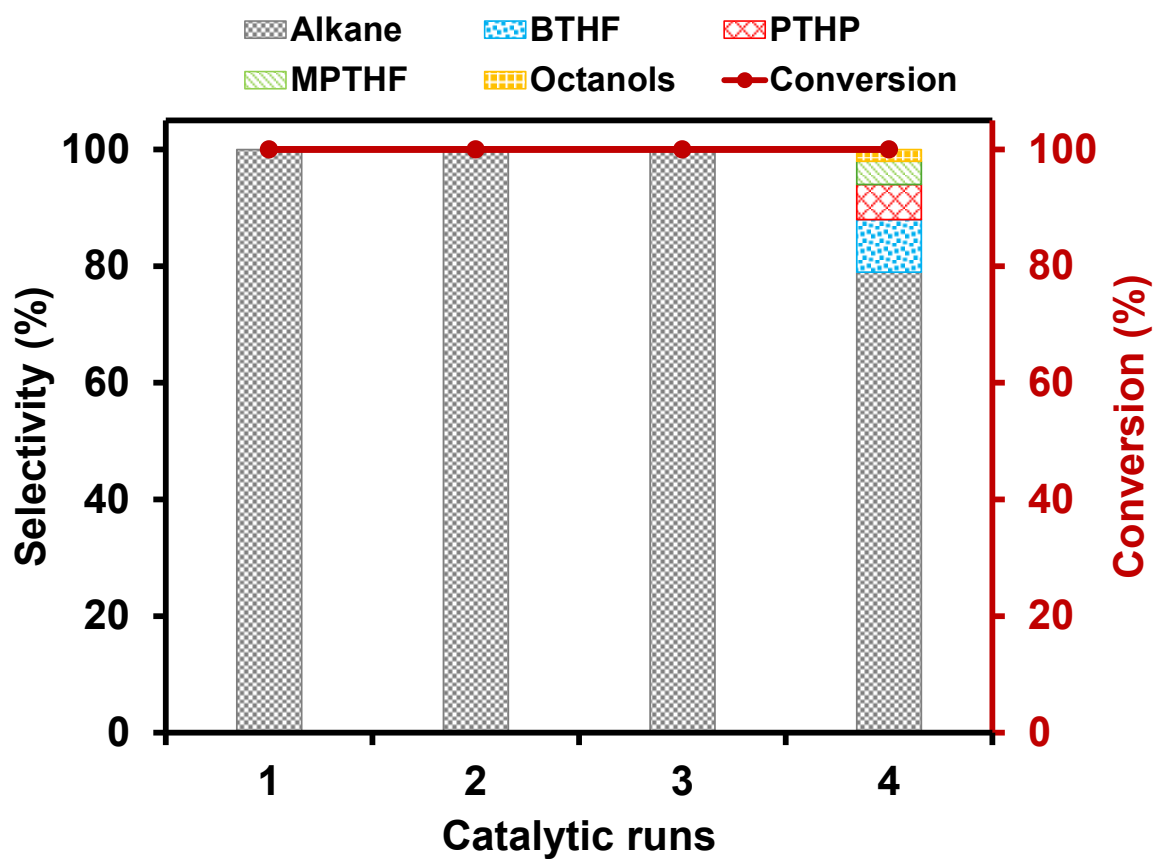

**Fig. S6** Recyclability experiment of Ru/5WZ catalyst for HDO of FAc to alkanes. Reaction Conditions: FAc (200 mg), Ru/5WZ (50 mg), 150 °C, 2 MPa H<sub>2</sub>, cyclohexane (10 mL), 3 h.

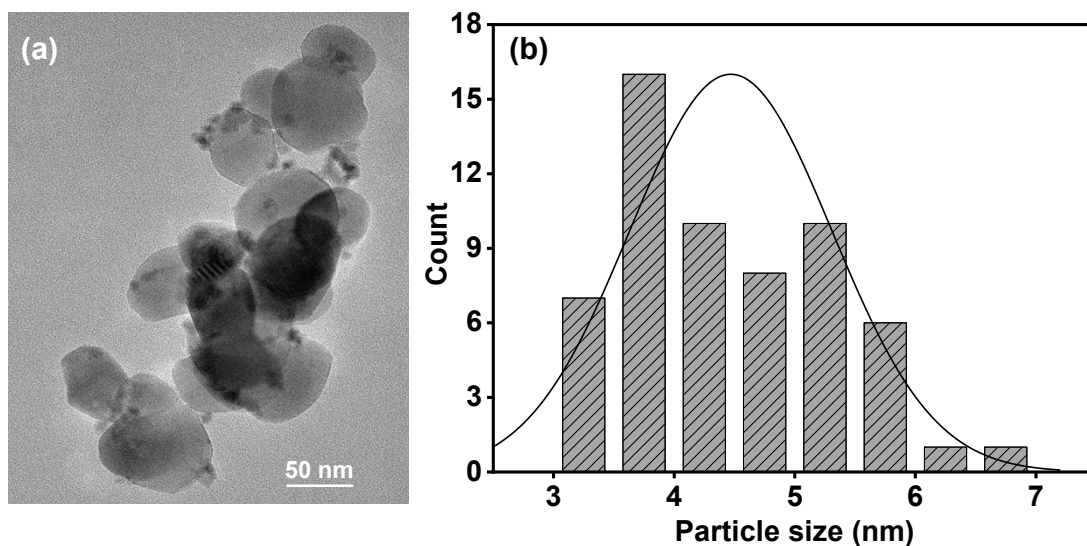

**Fig. S7** (a) TEM image and (b) particle size distribution curve for spent Ru/5WZ catalyst.

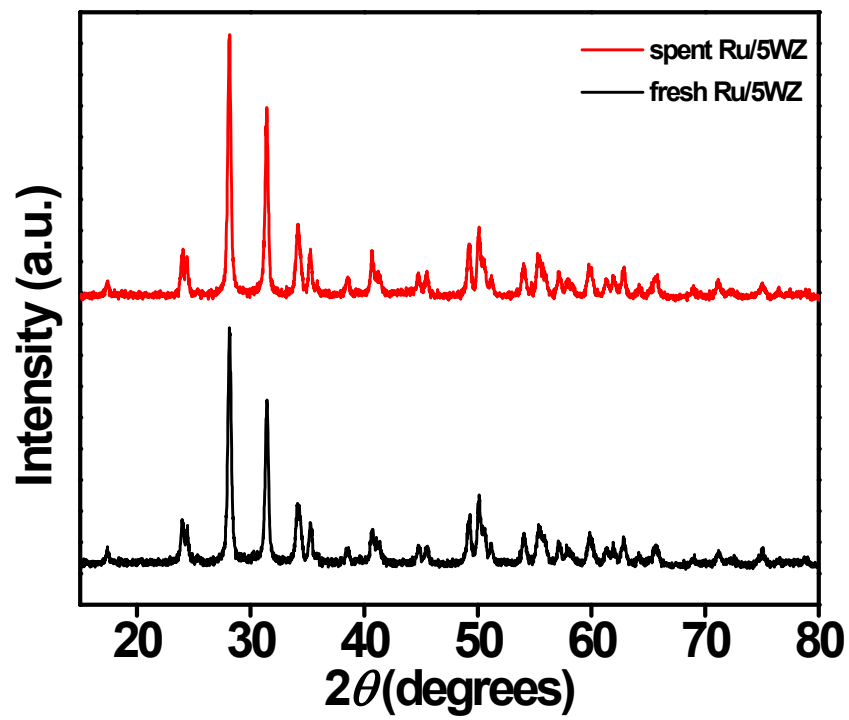

**Fig. S8** PXRD of fresh (below) and spent (above) Ru/5WZ catalyst.

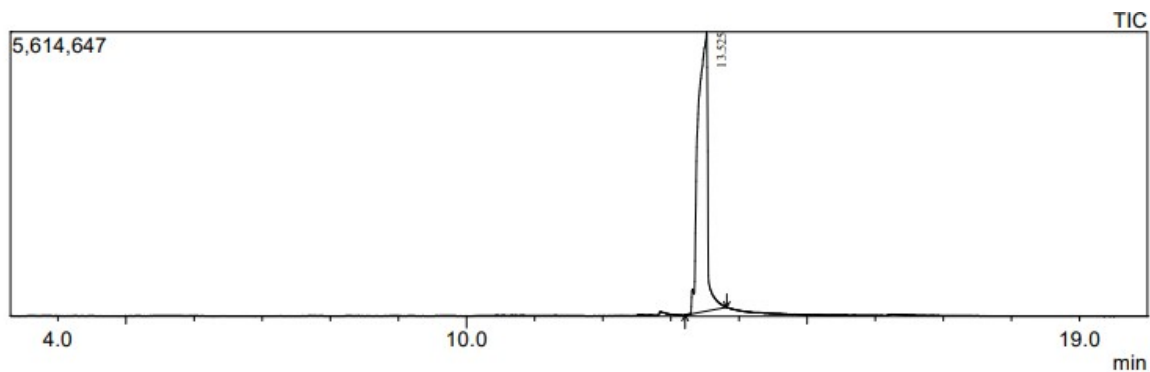

Peak Report TIC

| Peak# | R.Time | Area    | Area%  | Height  | Height% | A/H  | Name                 |
|-------|--------|---------|--------|---------|---------|------|----------------------|
| 1     | 13.525 | 4133208 | 100.00 | 5511214 | 100.00  | 9.82 | Furfurylideneacetone |
|       |        | 4133208 | 100.00 | 5511214 | 100.00  |      |                      |

Line#:1 R.Time:13.525(Scan#:2046)

MassPeaks:292

RawMode:Averaged 13.520-13.530(2045-2047) BasePeak:121(978033)

BG Mode:Calc. from Peak Group 1 - Event 1 Scan

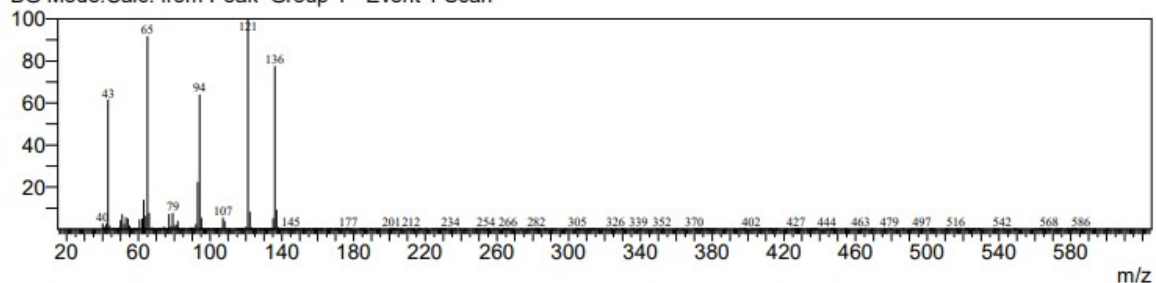

GC-MS data for FAc

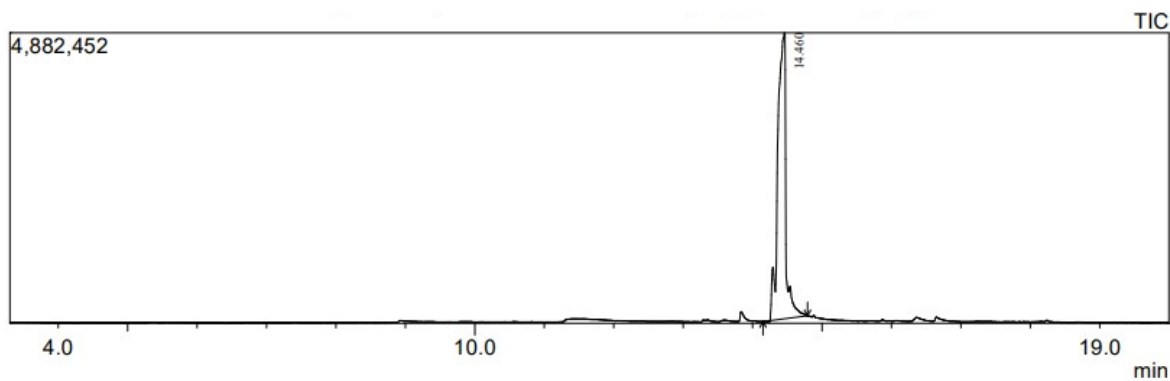

Peak Report TIC

| Peak# | R.Time | Area    | Area%  | Height  | Height% | A/H  | Name                           |
|-------|--------|---------|--------|---------|---------|------|--------------------------------|
| 1     | 14.460 | 8970026 | 100.00 | 4804357 | 100.00  | 8.11 | 4-methyl furfurylidene acetone |

Line#:1 R.Time:14.460(Scan#:2233)  
 MassPeaks:370  
 RawMode:Averaged 14.455-14.465(2232-2234) BasePeak:135(1353095)  
 BG Mode:Calc. from Peak Group 1 - Event 1 Scan

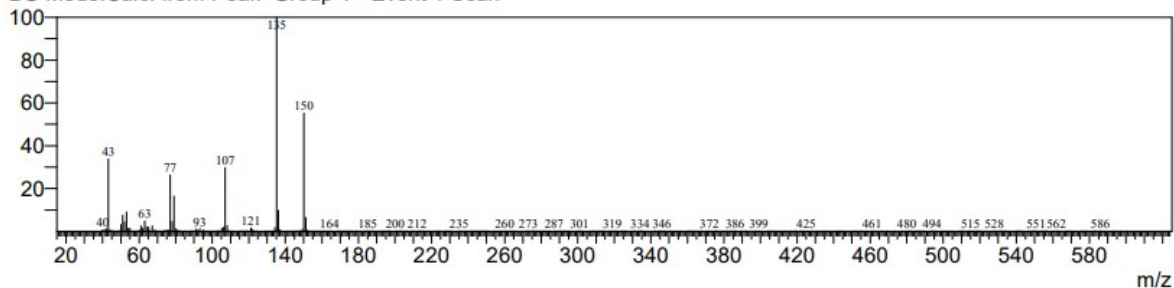

GC-MS data for MeFAc

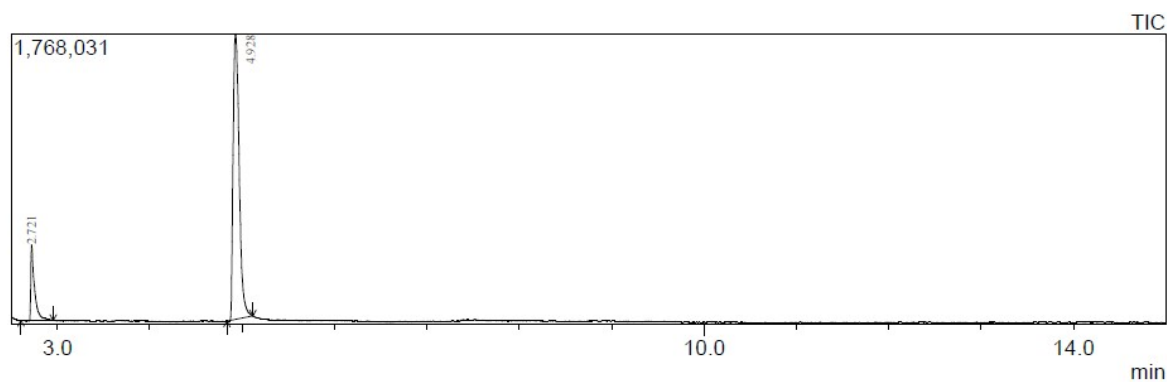

Peak Report TIC

| Peak# | R.Time | Area    | Area% | Height  | Height% | A/H  | Name    |
|-------|--------|---------|-------|---------|---------|------|---------|
| 1     | 2.721  | 1262644 | 13.66 | 459734  | 20.93   | 2.75 | Heptane |
| 2     | 4.928  | 7979542 | 86.34 | 1737054 | 79.07   | 4.59 | Octane  |

Spectrum

Line#:1 R.Time:2.720(Scan#:45)  
 MassPeaks:275  
 RawMode:Averaged 2.715-2.725(44-46) BasePeak:43(113290)  
 BG Mode:Calc. from Peak Group 1 - Event 1 Scan

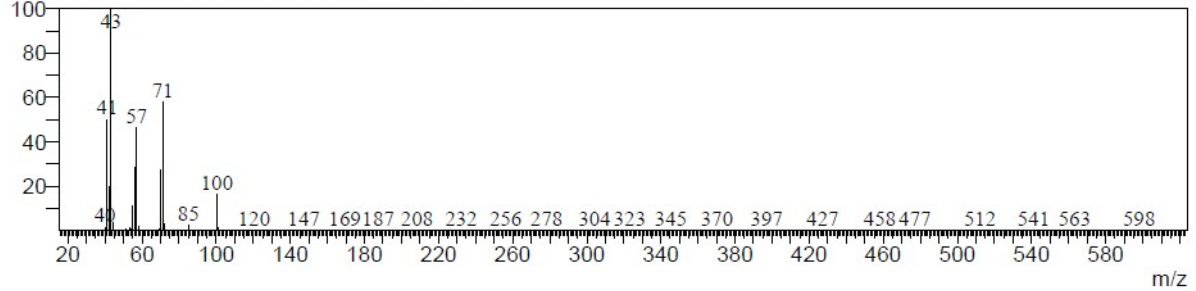

Line#:2 R.Time:4.930(Scan#:487)  
 MassPeaks:212  
 RawMode:Averaged 4.925-4.935(486-488) BasePeak:43(519848)  
 BG Mode:Calc. from Peak Group 1 - Event 1 Scan

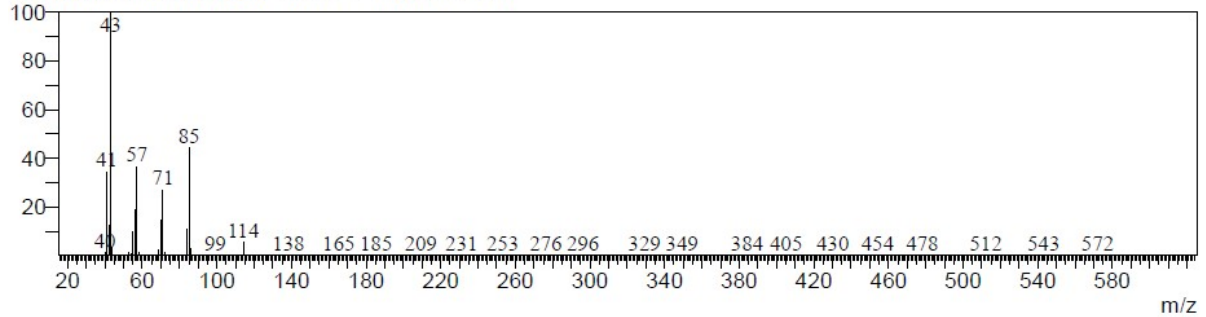

GC-MS data for HDO of FAc over Ru/5WZ catalyst.

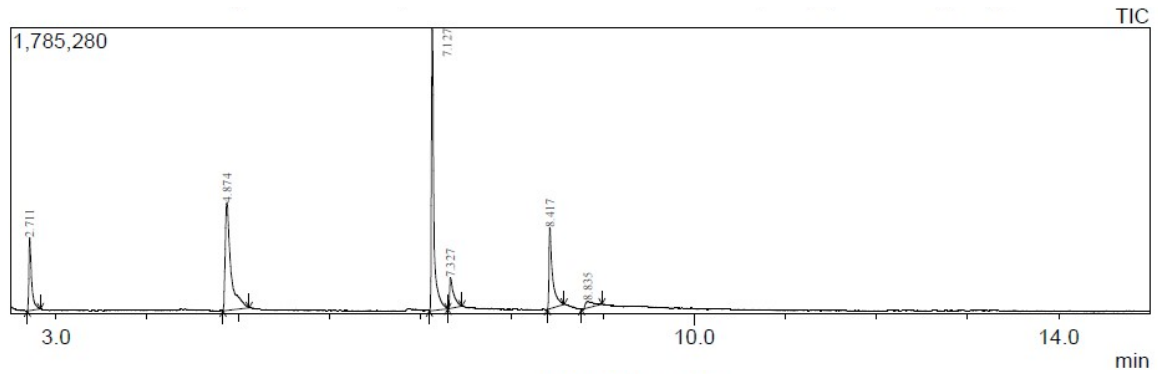

Peak Report TIC

| Peak# | R. Time | Area    | Area%  | Height  | Height% | A/H  | Name                              |
|-------|---------|---------|--------|---------|---------|------|-----------------------------------|
| 1     | 2.711   | 944655  | 10.09  | 454613  | 12.53   | 2.08 | Heptane                           |
| 2     | 4.874   | 2907176 | 31.04  | 673337  | 18.56   | 4.32 | Octane                            |
| 3     | 7.127   | 3337505 | 35.63  | 1764057 | 48.64   | 1.89 | 2-Propyltetrahydropyran           |
| 4     | 7.327   | 587983  | 6.28   | 189283  | 5.22    | 3.11 | 5-Methyl, 2-propyltetrahydrofuran |
| 5     | 8.417   | 1357330 | 14.49  | 505915  | 13.95   | 2.68 | Furan, 2-butyltetrahydro-         |
| 6     | 8.835   | 231660  | 2.47   | 39840   | 1.10    | 5.81 | 1-Octanol                         |
|       |         | 9366309 | 100.00 | 3627045 | 100.00  |      |                                   |

Spectrum

Line#:1 R.Time:2.710(Scan#:43)

MassPeaks:293

RawMode:Averaged 2.705-2.715(42-44) BasePeak:43(110390)

BG Mode:Calc. from Peak Group 1 - Event 1 Scan

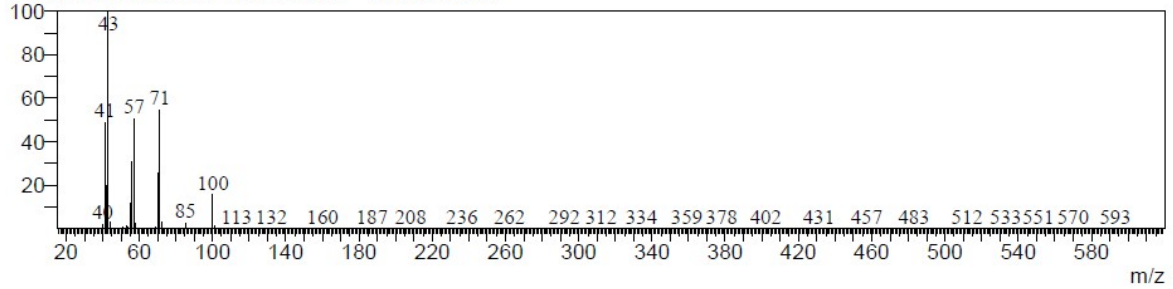

Line#:2 R.Time:4.875(Scan#:476)

MassPeaks:277

RawMode:Averaged 4.870-4.880(475-477) BasePeak:43(194419)

BG Mode:Calc. from Peak Group 1 - Event 1 Scan

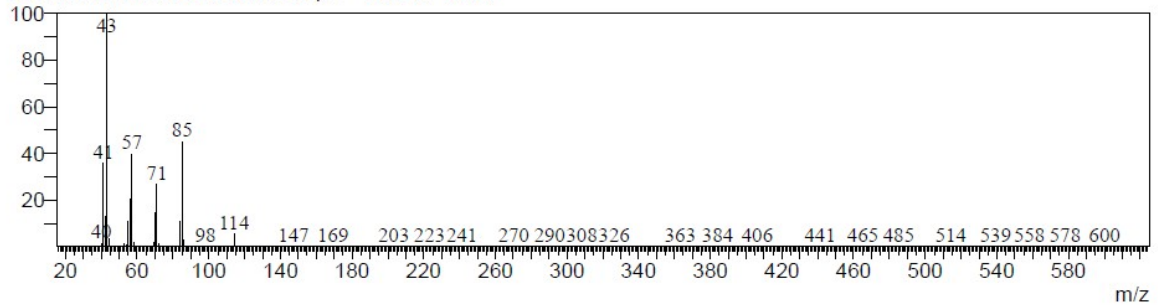

Line#:3 R.Time:7.125(Scan#:926)

MassPeaks:310

RawMode:Averaged 7.120-7.130(925-927) BasePeak:85(571516)

BG Mode:Calc. from Peak Group 1 - Event 1 Scan

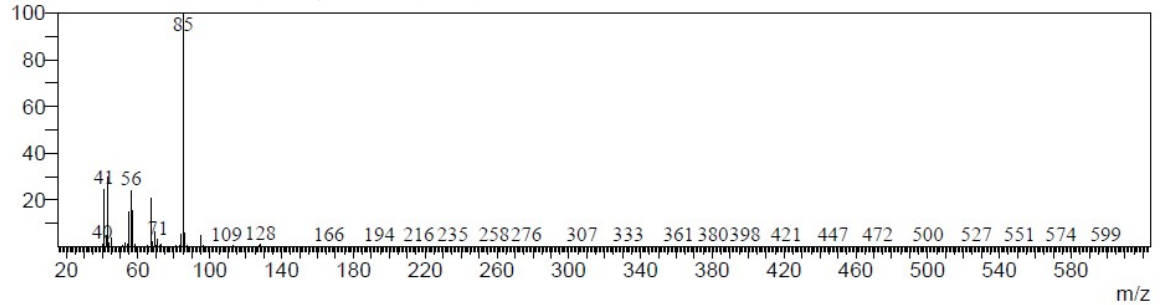

Line#:4 R.Time:7.325(Scan#:966)

MassPeaks:329

RawMode:Averaged 7.320-7.330(965-967) BasePeak:85(59450)

BG Mode:Calc. from Peak Group 1 - Event 1 Scan

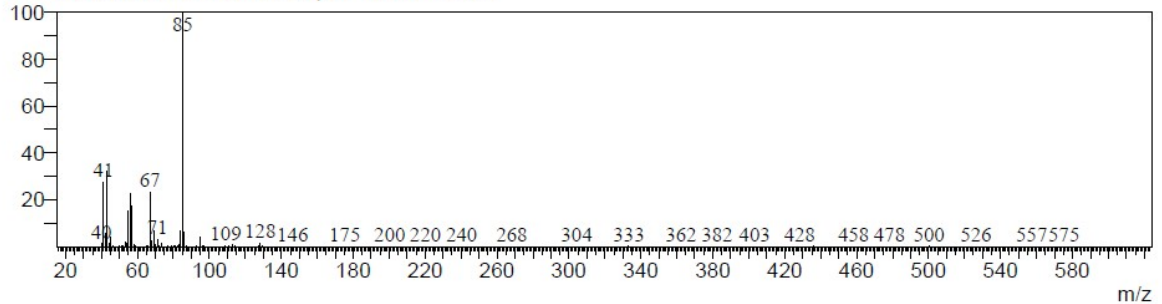

Line#:5 R.Time:8.415(Scan#:1184)  
MassPeaks:247  
RawMode:Averaged 8.410-8.420(1183-1185) BasePeak:71(252513)  
BG Mode:Calc. from Peak Group 1 - Event 1 Scan

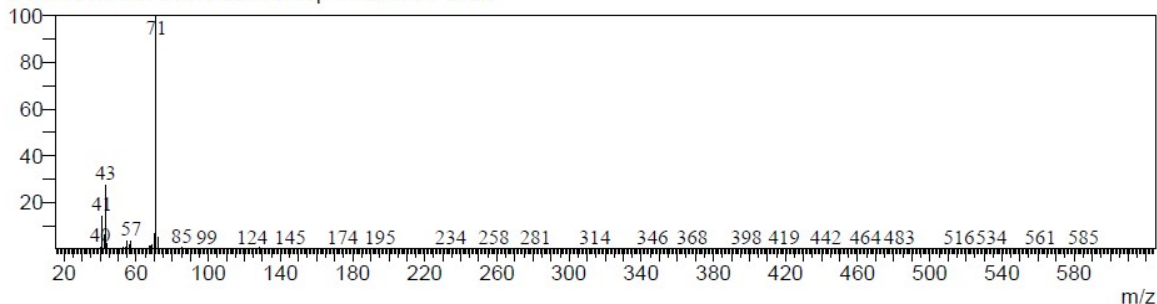

Line#:6 R.Time:8.835(Scan#:1268)  
MassPeaks:278  
RawMode:Averaged 8.830-8.840(1267-1269) BasePeak:69(8316)  
BG Mode:Calc. from Peak Group 1 - Event 1 Scan

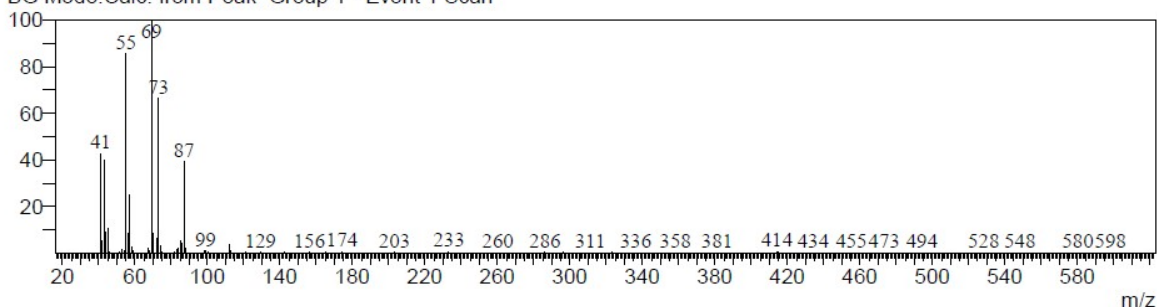

GC-MS data for HDO of FAc over Ru/5WZ catalyst showing the presence of all the intermediates.

## References.

- S1 W. Xu, Q. Xia, Y. Zhang, Y. Guo, Y. Wang and G. Lu, *ChemSusChem* 2011, **4**, 1758-1761.
- S2 Q. N. Xia, Q. Cuan, X. H. Liu, X. Q. Gong, G. Z. Lu, Y. Q. Wang, *Angew. Chem. Int. Ed.* 2014, **53**, 9755–9760.
- S3 Y. Shao, Q. Xia, X. Liu, G. Lu, Y. Wang, *ChemSusChem* 2015, **8**, 1761-1767.
- S4 P. Wang, Y. Jing, Y. Guo, Y. Cui, S. Dai, X. Liu, Y. Wang, *Catal. Sci. Technol.* 2020, **10**, 4256-4263.
- S5 S. Li, Q. Ma, W. Zhong, X. Zhao, X. Wei, X. Zhang, Q. Liu, C. Wang, L. Ma, Q. Zhang, *Green Chem.* 2021, **23**, 4741-4752.

- S6 A. D. Sutton, F. D. Waldie, R. Wu, M. Schlaf, L. A. ‘Pete’ Silks III and J. C. Gordon, *Nat. Chem.* 2013, **5**, 428-432.
- S7 J. Yang, S. Li, L Zhang, X. Liu, J. Wang, X. Pan, N. Li, A. Wang, Y. Cong, X. Wang and T. Zhang, *Appl. Catal. Environ.* 2017, **201**, 266-277.
- S8 S. Liu, W. Zheng, J. Fu, K. Alexopoulos, B. Saha and D. G. Vlachos, *ACS Catal.* 2019, **9**, 7679-7689.
- S9 S. Liu, S. Dutta, W. Zheng, N. S. Gould, Z. Cheng, B. Xu, B. Saha and D. G. Vlachos, *ChemSusChem* 2017, **10**, 3225-3234.
- S10 L. Chen, Y. Liu, X. Zhang, J. Liu, Q. Zhang and L. Ma, *Fuel*, 2023, **334**, 126665-126672.
- S11 K. Li, F. Zhou, X. Liu, H. Ma, J. Deng, G. Xu and Y. Zhang, *Catal. Sci. Technol.*, 2020, **10**, 1151-1160.
- S12 X. Li, X. Zeng and Y. Zhang, *Fuel Proces. Technol.* 2023, **232**, 107263-107271.
